CORRECTION

# Correction: Harmonizing the pixel size in retrospective computed tomography radiomics studies

Dennis Mackin, Xenia Fave, Lifei Zhang, Jinzhong Yang, A. Kyle Jones, Chuan S. Ng, Laurence Court

[S1 Table](#), [S1](#) and [S2](#) Figs appear incorrectly. The corrected files can be viewed below.

## Supporting information

**S1 Table. Summary of the OCCC values for 138 radiomics features.** This table supports Table 2 in the primary text and shows the results for Gaussian and mean low pass filters rather than Butterworth filters. As indicated in the first column, images were resampled to 1 mm/pixel and were filtered with a mean or Gaussian filter. The masks used to apply the filters to the image pixels were either 3x3 pixels or 5x5 pixels as indicated. The Gaussian filter widths were either 1 or 3 pixels as indicated by the sigma values. GL indicates gray level; NGTDM, neighborhood gray-tone difference matrix; BW, Butterworth; OCCC, overall concordance correlation coefficient.  
(PDF)

**S1 Fig. Hierarchical clusters of lung cancer patient CT scans using the Euclidean distance of the features entropy, busyness, and gray level non-uniformity.** The features were extracted from images that had (a) no resampling with a Butterworth filter (order 2, frequency cutoff 100), (b) resampling to 1 mm/pixel and filtering with a Butterworth filter (order 2, frequency cutoff 200), (c) resampling to 1 mm/pixel and filtering with a Butterworth filter (order 2, frequency cutoff 125), (d) resampling to 1 mm/pixel and filtering with a Butterworth filter (order 2, frequency cutoff 100), and (e) resampling to 1 mm/pixel and filtering with a Butterworth filter (order 2, frequency cutoff 75). Boxes indicate incorrect (red) and correct (blue) groupings of the 5 FOV scans for each patient.  
(PDF)

**S2 Fig. Hierarchical clusters of lung cancer patient CT scans using the Euclidean distance of the features entropy, busyness, and gray level non-uniformity.** The features were extracted from images that had (a) no preprocessing, (b) resampling to 1 mm/pixel, (c) resampling to 1 mm/pixel and filtering with a 3x3 pixel mean filter, (d) resampling to 1 mm/pixel and filtering with a 3x3 pixel, 1 mm width Gaussian filter, and (e) resampling to 1 mm/pixel and filtering with a 5x5 pixel, 3 mm width Gaussian filter. Boxes indicate incorrect (red) and correct (blue) groupings of the 5 FOV scans for each patient.  
(PDF)

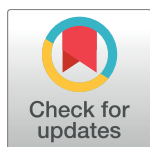

## OPEN ACCESS

**Citation:** Mackin D, Fave X, Zhang L, Yang J, Jones AK, Ng CS, et al. (2018) Correction: Harmonizing the pixel size in retrospective computed tomography radiomics studies. PLoS ONE 13(1): e0191597. <https://doi.org/10.1371/journal.pone.0191597>

**Published:** January 17, 2018

**Copyright:** © 2018 Mackin et al. This is an open access article distributed under the terms of the [Creative Commons Attribution License](#), which permits unrestricted use, distribution, and reproduction in any medium, provided the original author and source are credited.

## Reference

1. Mackin D, Fave X, Zhang L, Yang J, Jones AK, Ng CS, et al. (2017) Harmonizing the pixel size in retrospective computed tomography radiomics studies. PLoS ONE 12(9): e0178524. <https://doi.org/10.1371/journal.pone.0178524> PMID: [28934225](https://pubmed.ncbi.nlm.nih.gov/28934225/)
